# Supplementary material
Source: PubMed Central journal article supplement (PMC3278729)
Supplement: cdd2011114x2.pdf [file cdd2011114x2.pdf]

| Gene                             | Primer/Probe | Sequence                          | Annealing Temperature (°C) | Expected product size (bp) |
|----------------------------------|--------------|-----------------------------------|----------------------------|----------------------------|
| <i>Sox9</i>                      | sense        | 5'-CTCTGGAGGCTGCTGAACG-3'         | 59.5                       | 248                        |
|                                  | antisense    | 5'-GGGGAGTGCACCTCACTCAT-3'        |                            |                            |
|                                  | probe        | FAM-CCCTTCGTGGAGGAGGCGGA-TMR      |                            |                            |
| <i>Col2a</i>                     | sense        | 5'-ACGGTGGCTTCCACTTCA-3'          | 66                         | 243                        |
|                                  | antisense    | 5'-TACATCATTGGAGCCCTGGA-3'        |                            |                            |
|                                  | probe        | FAM-AACCTGGCTCCCAACACCGCTAA-TMR   |                            |                            |
| <i>Gapdh</i>                     | sense        | 5'-GGAAGGGCTCATGACCACA-3'         | 62                         | 164                        |
|                                  | antisense    | 5'-CCGTTTCAGCTCTGGGATGAC-3'       |                            |                            |
|                                  | probe        | FAM-TGGCCCCXTCTGGAAAGCTGTGGCG-TMR |                            |                            |
| Primers for SYBR green detection |              |                                   |                            |                            |
| <i>Snai1</i>                     | sense        | 5'-TCTGAAGATGCACATCCGAAGC-3'      | 60                         | 128                        |
|                                  | antisense    | 5'-AGCAGGAGAATGGCTTCTCACC-3'      |                            |                            |

(X: position of internal TMR).

Supplemental Table 1: Primers and probes used for qPCR (except TaqMan Gene Expression Assays-on-Demand assays)
