# Supplementary material
Source: PubMed Central journal article supplement (PMC3278729)
Supplement: cdd2011114x3.pdf [file cdd2011114x3.pdf]

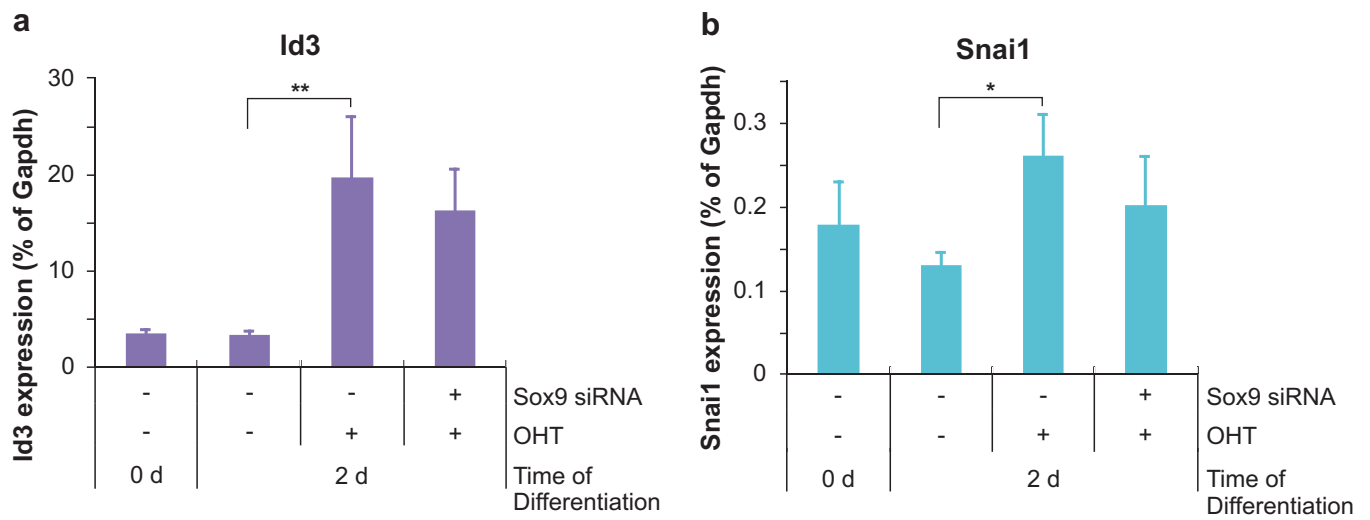

**Supplement Figure S1.** Induction of early neural crest genes by activated Notch1. ESC were differentiated towards chondrocytic differentiation, and Notch1 signaling was activated by addition of OHT for 2 d. At the same time some cells were treated additionally with Sox9 siRNA. At day 0 and 2 RNA was extracted and used for RT-qPCR. (a) Expression of *Id3* relative to *Gapdh*. (b) Expression of *Snai1* relative to *Gapdh*. Error bars indicate s.e.m. from 4 independent experiments. One-way ANOVA with subsequent Tukey analysis revealed statistically significant inductions by OHT (\*  $p < 0.05$  or \*\*  $p < 0.01$ ).

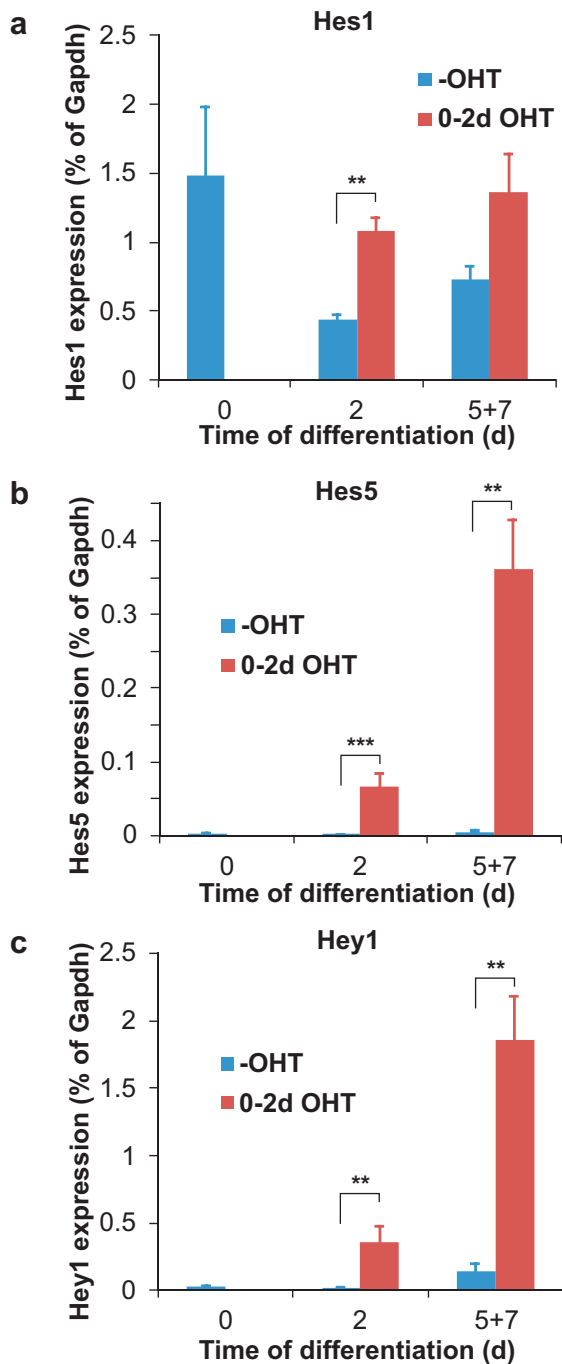

**Supplement Figure S2.** Hes/Hey genes are induced by Notch1 during chondrogenic ES cell differentiation. ESC were differentiated towards chondrocytic differentiation, and Notch1 signaling was activated by addition of OHT for 2 d. At indicated time points cells were harvested and extracted RNA was used for RT-qPCR. Expression of *Hes1* (a), *Hes5* (b), and *Hey1* (c) is shown relative to *Gapdh*. Error bars indicate s.e.m. from 3 independent experiments. Two-way ANOVA with subsequent Tukey analysis revealed statistically significant inductions by OHT (\*\*  $p < 0.01$  or \*\*\*  $p < 0.001$ ).
